# Supplementary material for: Predictors of Playing Augmented Reality Mobile Games While Walking Based on the Theory of Planned Behavior: Web-Based Survey
Source: PubMed Central journal article supplement (PMC5742645; doi:10.2196/mhealth.8470), 2017-12-11
Supplement: mhealth_v5i12e191_app1.pdf [file mhealth_v5i12e191_app1.pdf]

8. Please click the button that best represents your thought.

|                                                                         | Strongly Disagree (1) | Disagree (2)          | Somewhat Disagree (3) | Neither Agree nor Disagree (4) | Somewhat Agree (5)    | Agree (6)             |
|-------------------------------------------------------------------------|-----------------------|-----------------------|-----------------------|--------------------------------|-----------------------|-----------------------|
| 1. I often use my cell phone for no particular reason.                  | <input type="radio"/> | <input type="radio"/> | <input type="radio"/> | <input type="radio"/>          | <input type="radio"/> | <input type="radio"/> |
| 2. I feel connected to others when I am using my cell phone.            | <input type="radio"/> | <input type="radio"/> | <input type="radio"/> | <input type="radio"/>          | <input type="radio"/> | <input type="radio"/> |
| 3. I am concerned that I rely too much on my cell phone.                | <input type="radio"/> | <input type="radio"/> | <input type="radio"/> | <input type="radio"/>          | <input type="radio"/> | <input type="radio"/> |
| 4. I keep checking my cell phone for messages or calls.                 | <input type="radio"/> | <input type="radio"/> | <input type="radio"/> | <input type="radio"/>          | <input type="radio"/> | <input type="radio"/> |
| 5. I feel anxious when I am unable to use my cell phone.                | <input type="radio"/> | <input type="radio"/> | <input type="radio"/> | <input type="radio"/>          | <input type="radio"/> | <input type="radio"/> |
| 6. The thought of being without my cell phone makes me feel distressed. | <input type="radio"/> | <input type="radio"/> | <input type="radio"/> | <input type="radio"/>          | <input type="radio"/> | <input type="radio"/> |
| 7. I get excited when I hear my cell phone ring.                        | <input type="radio"/> | <input type="radio"/> | <input type="radio"/> | <input type="radio"/>          | <input type="radio"/> | <input type="radio"/> |
| 8. I get excited when I receive a text message.                         | <input type="radio"/> | <input type="radio"/> | <input type="radio"/> | <input type="radio"/>          | <input type="radio"/> | <input type="radio"/> |

9. What is your age? For example, if you are 21 years-old, put the number 21 below.

10. When were you born? For example, if you were born in 1992, put the number 1992 below.

11. What is your sex?

- Male (0)
- Female (1)

12. Your ethnicity is

- Caucasian (1)
- Asian / Asian American (2)
- Hispanic / Hispanic American (3)
- African American (4)
- Native American (5)
- Pacific Islander (6)
- Others (7)

[The following questions are only for Study 2 – Mturk]

13. What is the highest level of education you have completed so far?

- Less than high school (1)
- High school/GED (2)
- Some college (3)
- 2 year college degree (Associate) (4)
- 4 year college degree (BA/BS) (5)
- Professional degree (MD/JD) (6)
- Master's degree (7)
- Doctoral degree (8)

14. What is your total household income last year (before tax)?

- Less than \$25,000 (1)
- \$25,000 to \$49,999 (2)
- \$50,000 to \$74,999 (3)
- \$75,000 to \$99,999 (4)
- \$100,000 or more (5)
